# Supplementary material for: Coheritability and Genetic Advances of Agromorphological and Oil Quality Traits in Groundnut (Arachis hypogaea L.) Genotypes from Ethiopia
Source: Hindawi journal article supplement (doi:10.1155/2021/5148772), 2021-12-24
Supplement: f1 [file 5148772.f1.pdf]

.....

[REDACTED]
